# Supplementary material for: Formation of highly uniform thinly-wrapped CsPbX3@silicone nanocrystals via self-hydrolysis: suppressed anion exchange and superior stability in polar solvents
Source: Royal Society of Chemistry journal article supplement (doi:10.1039/c9tc01216h), 2019-01-01
Supplement: c9tc01216h1.pdf [file c9tc01216h1.pdf]

# Highly Uniform Thinly-Wrapped CsPbX<sub>3</sub>@Silicone Nanocrystals via Self Hydrolysis: Suppressed Anion Exchange and Superior Stability in Polar Solvents

Haifeng Zhao<sup>#,†,‡</sup>, Linfeng Wei<sup>#,†,‡</sup>, Peng Zeng<sup>†,‡</sup>, Mingzhen Liu<sup>\*,†,‡</sup>

<sup>†</sup> Center for Applied Chemistry, University of Electronic and Technology of China, Chengdu 611731, P. R. China.

<sup>‡</sup> School of Materials and Energy, University of Electronic and Technology of China, Chengdu 611731, P. R. China.

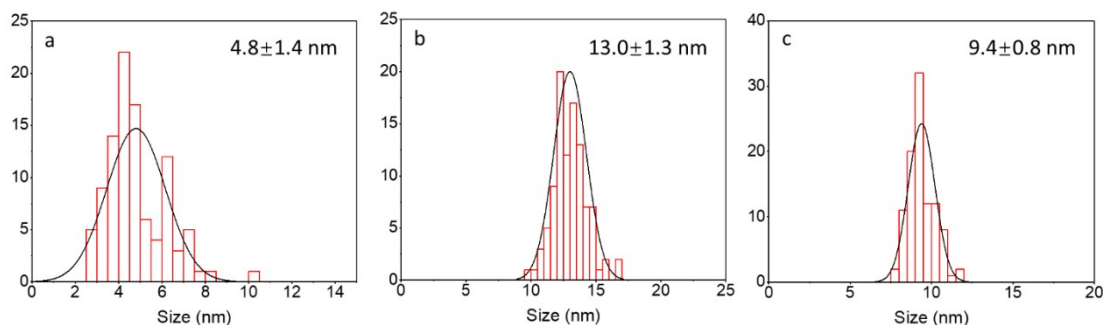

**Fig. S1** Size distribution of (a) CsPbBr<sub>3</sub>-silicone matrix composite, (b) CsPbBr<sub>3</sub>@silicone and (c) conventional OAm-CsPbBr<sub>3</sub> nanocrystals.

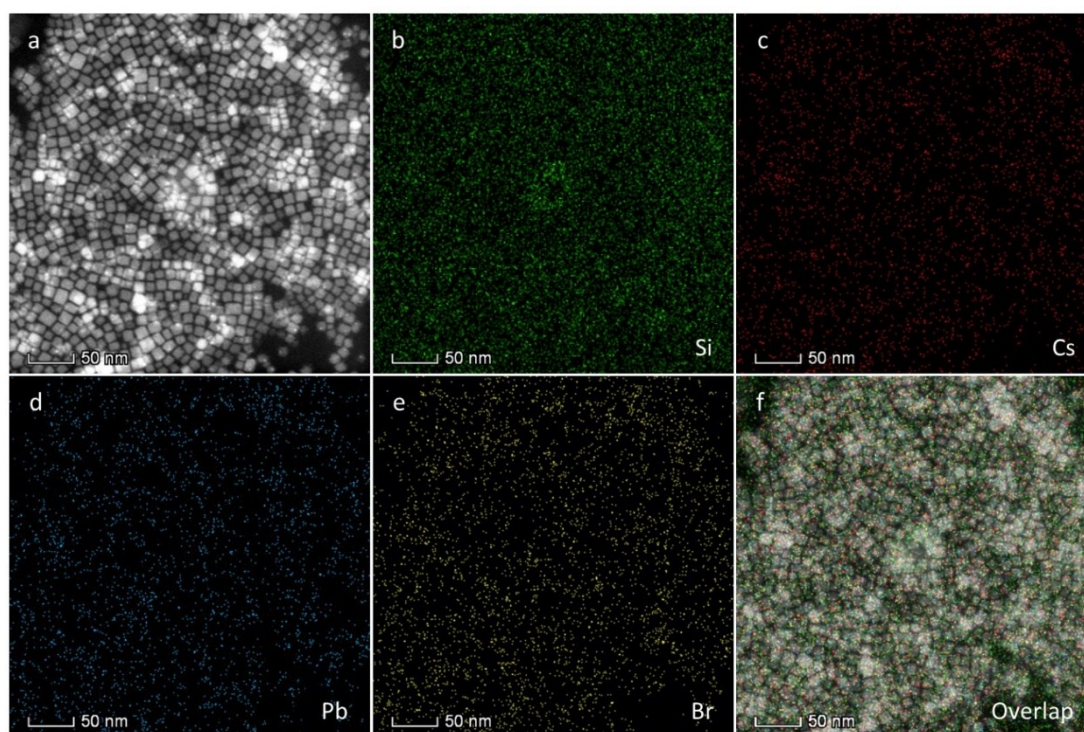

**Fig. S2** (a) HAADF-TEM image and elemental mapping images of CsPbBr<sub>3</sub>@silicone showing the elemental distribution of (b) Si (green), (c) Cs (red), (d) Pb (light blue), (e) Br (light yellow) and (f) overlapped image.

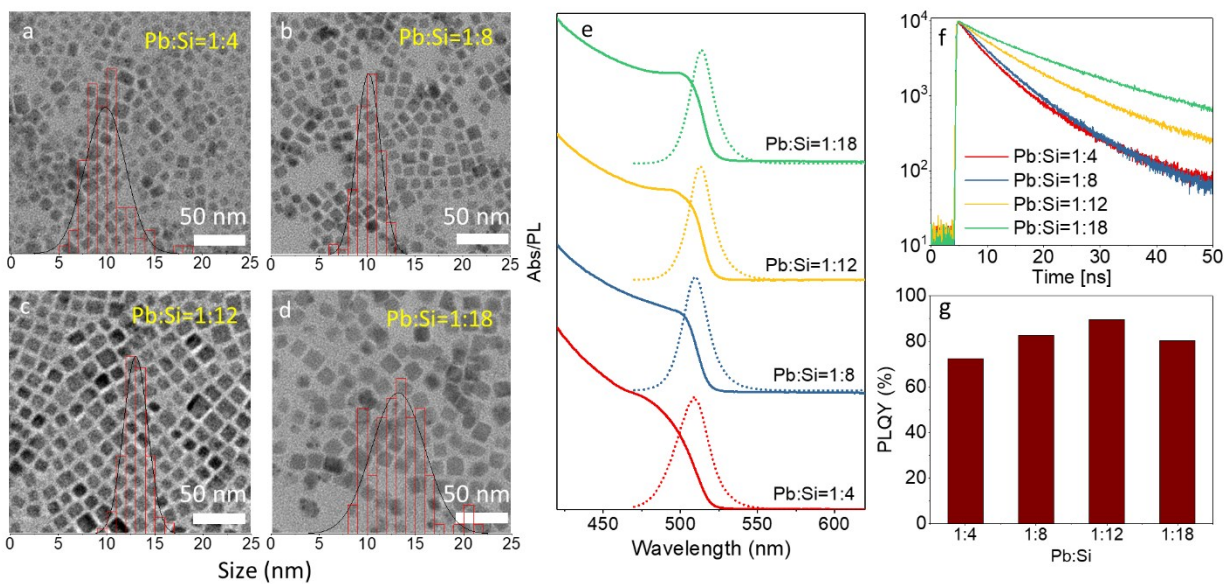

**Fig. S3** Characterization of CsPbBr<sub>3</sub>@silicone nanocrystals synthesized with increasing mole ratio of PbBr<sub>2</sub>: APTES from 1:4 to 1:18: (a)-(d) TEM and corresponding size distribution, (e) UV-Vis and PL spectra, (f) PL decay and (g) PL QY.

**Measurements of Electron Extraction Rates.** Time-resolved PL decay were fitted to

$$A(t) = A_1 \exp\left(-\frac{\tau}{\tau_1}\right) + A_2 \exp\left(-\frac{\tau}{\tau_2}\right) + A_3 \exp\left(-\frac{\tau}{\tau_3}\right). \quad (1)$$

The average lifetimes were calculated using the intensity-weighted model as

$$\tau = (A_1 \tau_1^2 + A_2 \tau_2^2 + A_3 \tau_3^2) / (A_1 \tau_1 + A_2 \tau_2 + A_3 \tau_3). \quad (2)$$

The electron extraction rate  $k$  can be obtained using the following equation:

$$k = \frac{1}{\tau_{ET}} = \frac{1}{\tau_{ave, TiO_2}} - \frac{1}{\tau_{ave, PMMA}}. \quad (3)$$

And all results are summarized in Table S1.

|                                   |                  | $\tau_1$ (ns) | $A_1$ | $\tau_2$ (ns) | $A_2$            | $\tau_3$ (ns) | $A_3$ | $\tau_{ave}$ (ns) | $k$ ( $ns^{-1}$ ) |
|-----------------------------------|------------------|---------------|-------|---------------|------------------|---------------|-------|-------------------|-------------------|
| OAm-<br>CsPbBr <sub>3</sub>       | TiO <sub>2</sub> | 19.02         | 101   | 5.44          | 4999             | 2.67          | 6989  | 4.90              | 0.053             |
|                                   | PMMA             | 14.96         | 516   | 5.61          | $\frac{1147}{9}$ | -             | -     | 6.61              |                   |
| CsPbBr <sub>3</sub> @<br>silicone | TiO <sub>2</sub> | 35.76         | 1069  | 13.48         | 5969             | 3.33          | 4706  | 18.63             | 0.013             |
|                                   | PMMA             | 45.75         | 1230  | 16.80         | 6387             | 4.10          | 4505  | 24.46             |                   |
| OAm-<br>CsPbI <sub>3</sub>        | TiO <sub>2</sub> | 33.06         | 624   | 10.66         | 6652             | 2.27          | 4281  | 14.42             | 0.006             |
|                                   | PMMA             | 17.11         | 3262  | 41.59         | 334              | 9.66          | 7414  | 15.74             |                   |
| CsPbI <sub>3</sub> @<br>silicone  | TiO <sub>2</sub> | 103.33        | 1714  | 46.06         | 6253             | 15.83         | 4256  | 61.29             | 0.003             |

---

|      |        |      |       |      |       |      |       |
|------|--------|------|-------|------|-------|------|-------|
| PMMA | 129.00 | 1533 | 56.13 | 5916 | 19.92 | 4354 | 74.41 |
|------|--------|------|-------|------|-------|------|-------|

---

**Table S1** The fitting results of PL decay for thinly-wrapped CsPbBr<sub>3</sub>@silicone (CsPbI<sub>3</sub>@silicone) and OAm-CsPbBr<sub>3</sub> (OAm-CsPbI<sub>3</sub>) nanocrystals coated on PMMA and TiO<sub>2</sub> films, respectively.

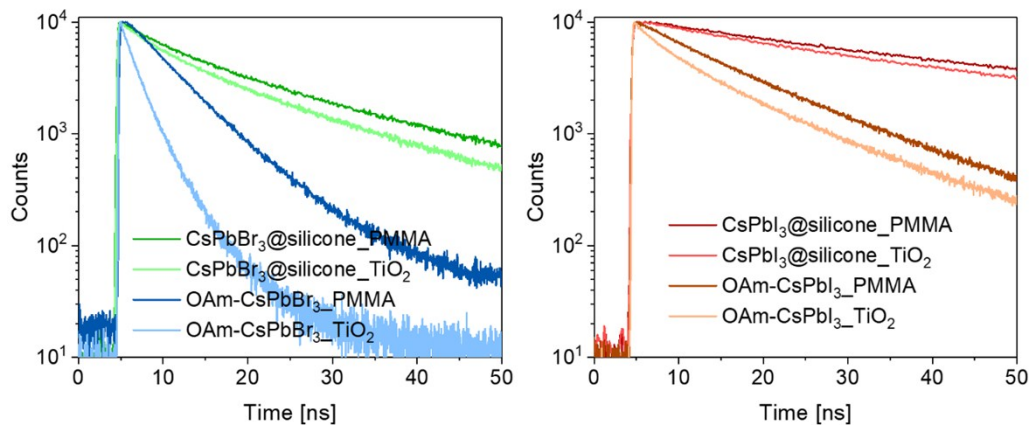

**Fig. S4** PL decay of  $\text{CsPbBr}_3@silicone$  ( $\text{CsPbI}_3@silicone$ ) and  $\text{OAm-CsPbBr}_3$  ( $\text{OAm-CsPbI}_3$ ) nanocrystals coated on PMMA and  $\text{TiO}_2$  films, respectively.

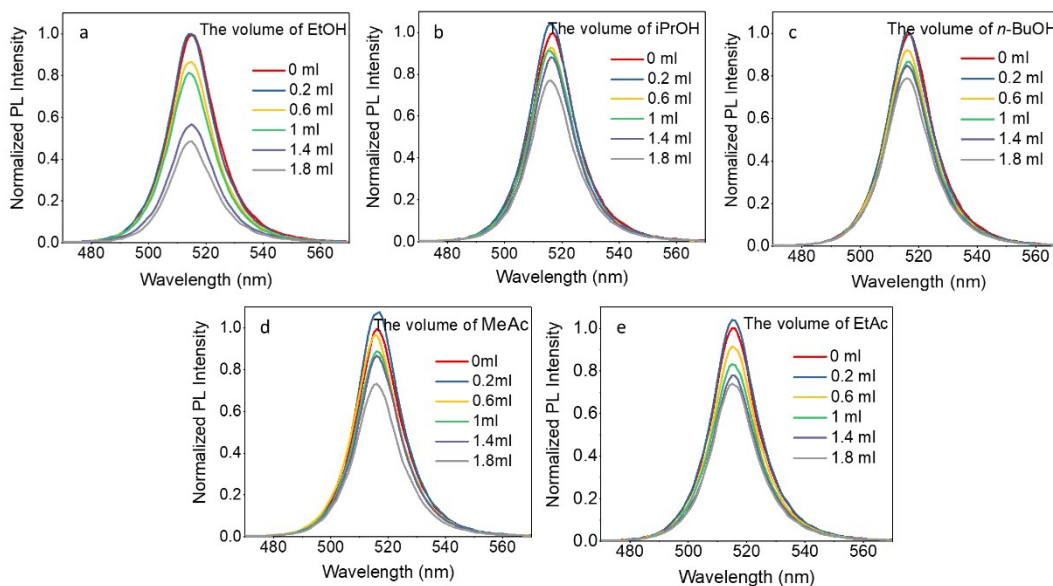

**Fig. S5** PL peak emission intensities of CsPbBr<sub>3</sub>@silicone in octane with different polar solvent of different volume ratios: (a) ethanol (EtOH), (b) isopropyl alcohol (iPrOH), (c) *n*-Butyl alcohol (*n*-BuOH), (d) methyl acetate (MeAc) and (e) ethyl acetate (EtAc).

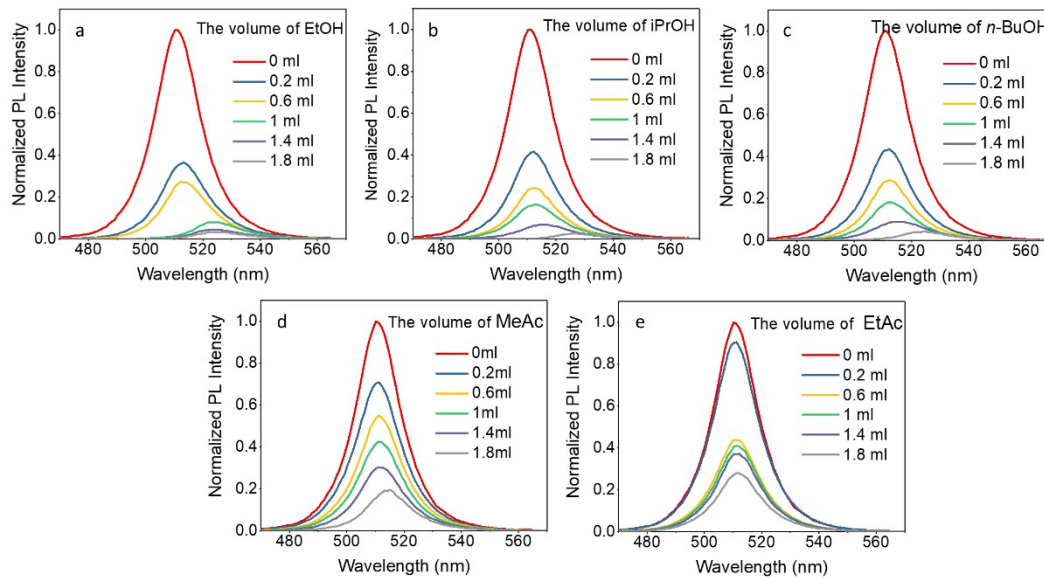

**Fig. S6** PL peak emission intensities of OAM-CsPbBr<sub>3</sub> in octane with different polar solvent of different volume ratios: (a) ethanol (EtOH), (b) isopropyl alcohol (iPrOH), (c) *n*-Butyl alcohol (*n*-BuOH), (d) methyl acetate (MeAc) and (e) ethyl acetate (EtAc).

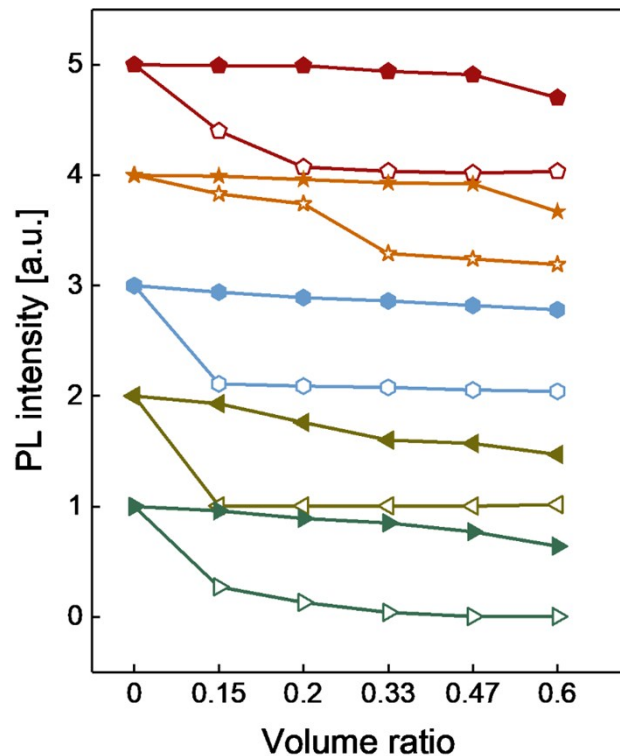

**Fig. S7.** PL emission peak intensities of CsPbI<sub>3</sub>@silicone (solid symbols) and OAm-CsPbI<sub>3</sub> (hollow symbols) in octane with different polar solvents of varying volume ratios (from top to bottom: EtOH, iPrOH, *n*-BuOH, MeAc and EtAc).



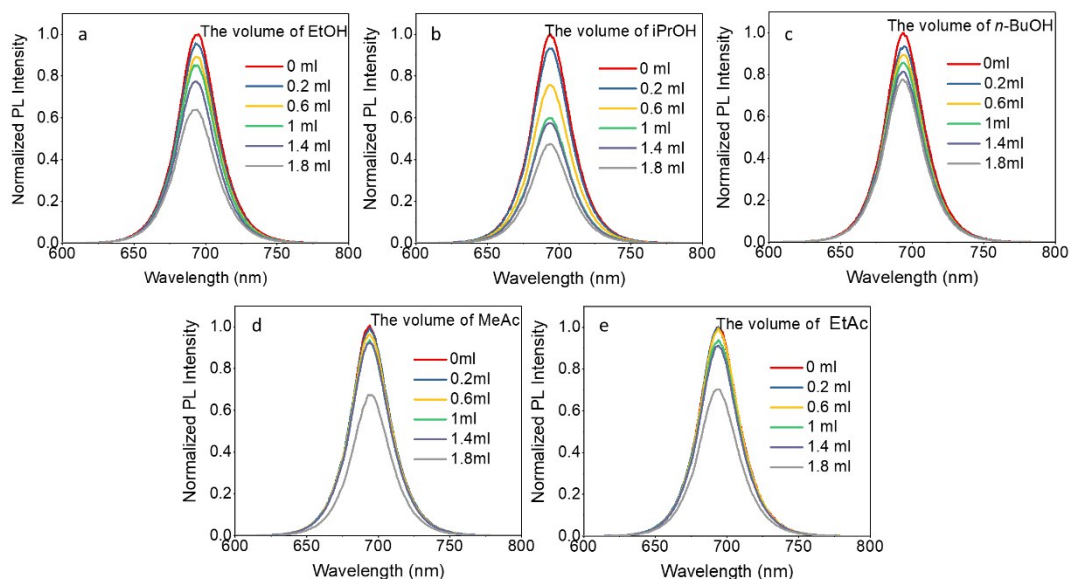

**Fig. S8** PL peak emission intensities of CsPbI<sub>3</sub>@Silicone in octane with different polar solvent of different volume ratios: (a) ethanol (EtOH), (b) isopropyl alcohol (iPrOH), (c) *n*-Butyl alcohol (*n*-BuOH), (d) methyl acetate (MeAc) and (e) ethyl acetate (EtAc).

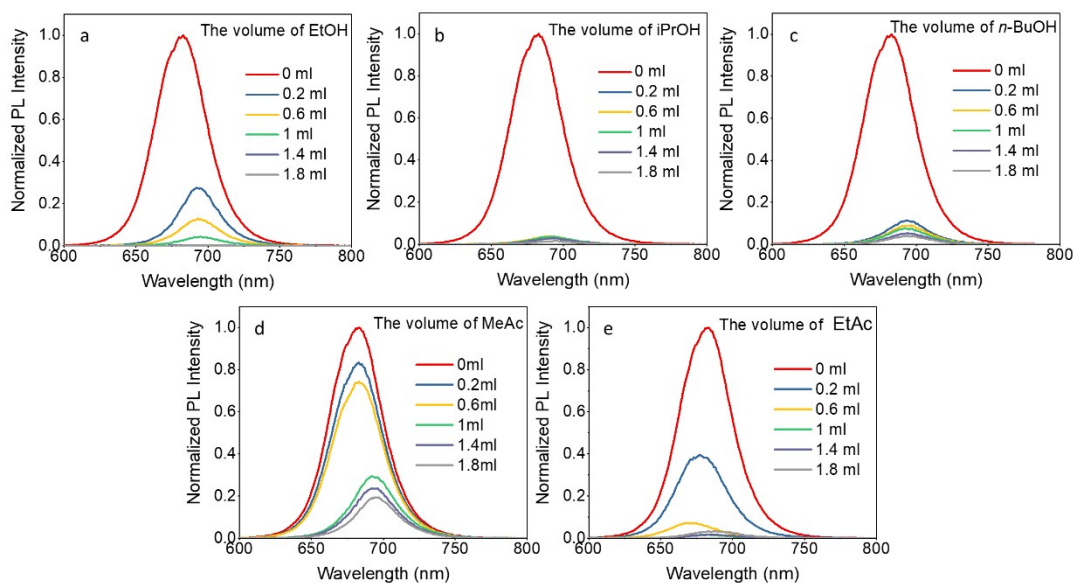

**Fig. S9** PL peak emission intensities of OAm-CsPbI<sub>3</sub> in octane with different polar solvent of different volume ratios: (a) ethanol (EtOH), (b) isopropyl alcohol (iPrOH), (c) *n*-Butyl alcohol (*n*-BuOH), (d) methyl acetate (MeAc) and (e) ethyl acetate (EtAc).

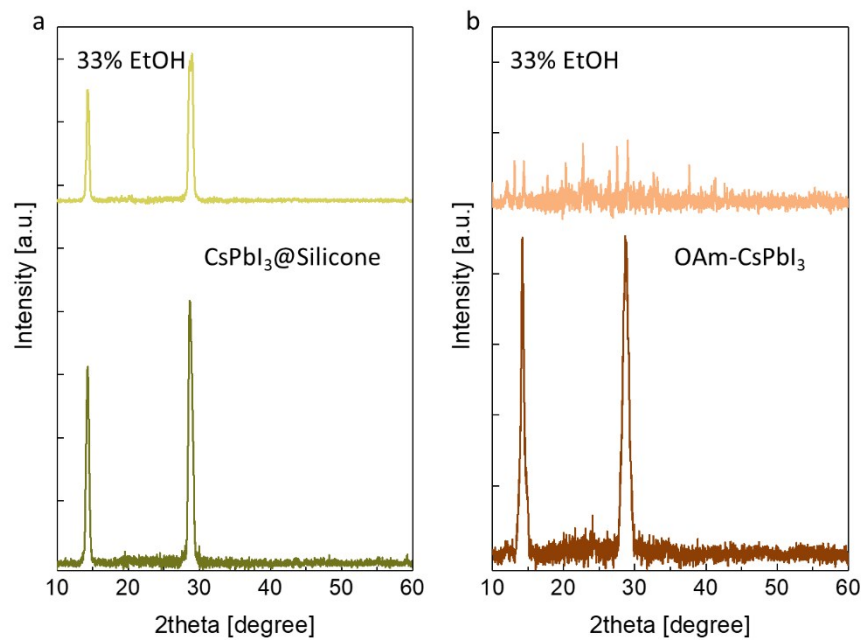

**Fig. S10** XRD patterns measured before (bottom curves) and after (top curves) the addition of 33% ethanol in (a) CsPbI<sub>3</sub>@silicone and (b) OAm-CsPbI<sub>3</sub> nanocrystals.

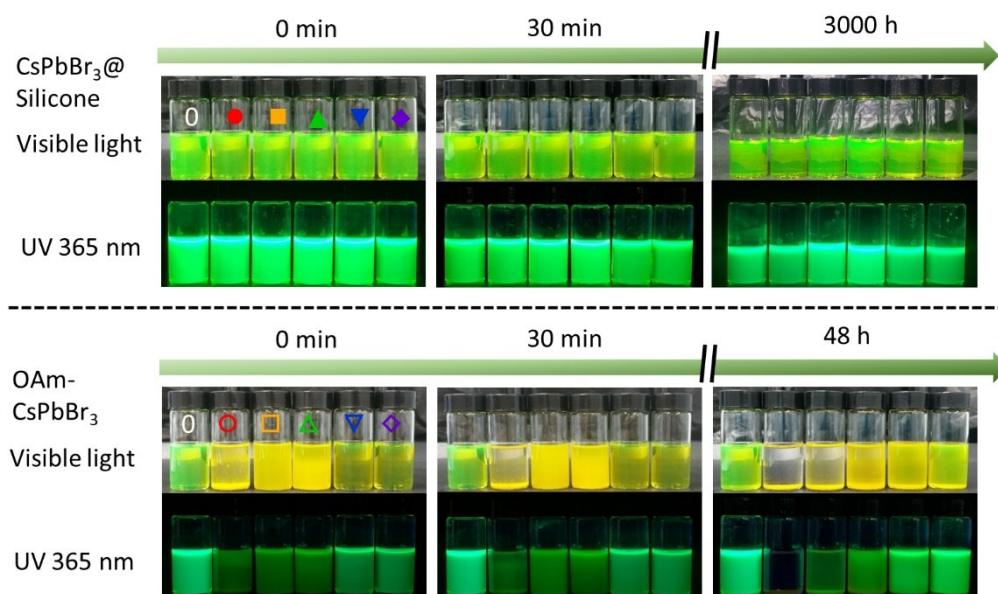

**Fig. S11** Photos of CsPbBr<sub>3</sub>@silicone and OAm-CsPbBr<sub>3</sub> nanocrystals in different polar solvents (33%) in natural light and UV 365 nm. (from left to right: octane, EtOH, iPrOH, *n*-BuOH, MeAc and EtAc, CsPbBr<sub>3</sub>@silicone (solid symbols) and OAm-CsPbBr<sub>3</sub> (hollow symbols)).

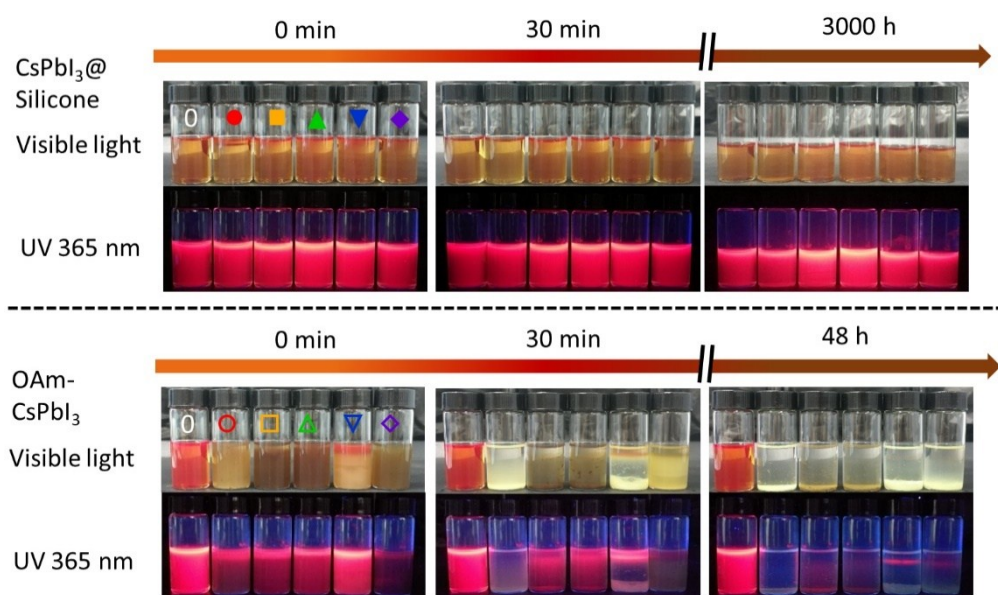

**Fig. S12** Photos of CsPbI<sub>3</sub>@silicone and OAm-CsPbI<sub>3</sub> nanocrystals in different polar solvents (33%) in natural light and UV 365 nm. (from left to right: octane, EtOH, iPrOH, *n*-BuOH, MeAc and EtAc, CsPbI<sub>3</sub>@silicone (solid symbols) and OAm-CsPbI<sub>3</sub> (hollow symbols)).

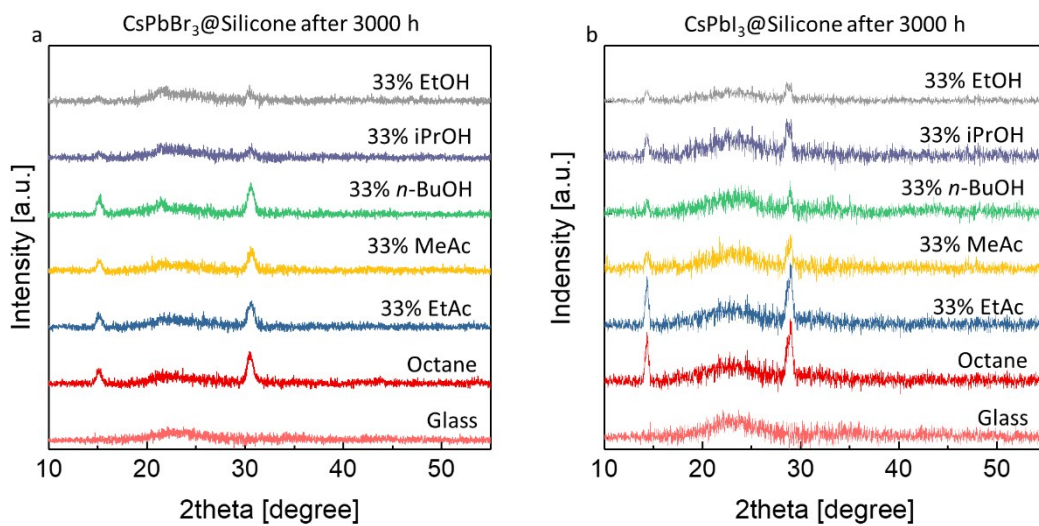

**Fig. S13** XRD patterns measured in octane with different polar solvents of 33% volume ratios after 3000 h for (a)  $\text{CsPbBr}_3$ @silicone and (b)  $\text{CsPbI}_3$ @silicone nanocrystals.

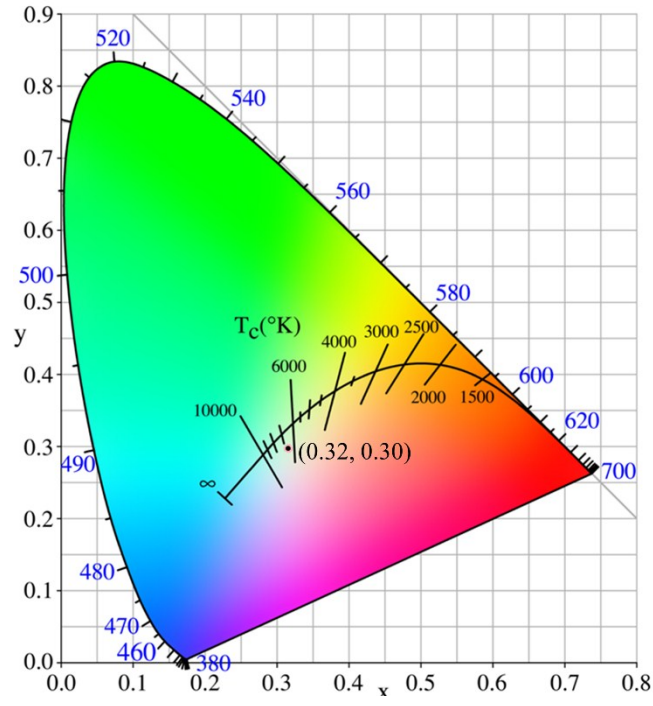

**Fig. S14** CIE color coordinates of the WLED device.
